# Supplementary material
Source: PubMed Central journal article supplement (PMC6076859)
Supplement: NIHMS1500745-supplement-1.pdf [file NIHMS1500745-supplement-1.pdf]

## **Supporting Information**

Surface modification of polymer nanoparticles with native albumin for enhancing drug delivery to solid tumors

*Hyesun Hyun, Joonyoung Park, Kiela Willis, Ji Eun Park, L. Tiffany Lyle, Woojin Lee, Yoon Yeo*

4 Supporting Tables

16 Supporting Figures

**Table S1.** Size and zeta potential of NPs<sup>a</sup>

| NP type  | z-average (d.nm) | Polydispersity index (PI) | Zeta potential (mV) |
|----------|------------------|---------------------------|---------------------|
| NP       | 181 ± 18         | 0.08 ± 0.04               | -2.4 ± 0.7          |
| NP-pD    | 188 ± 28         | 0.09 ± 0.08               | -3 ± 1              |
| NP/Al    | 174 ± 13         | 0.08 ± 0.06               | -3 ± 1              |
| NPxAl    | 173 ± 36         | 0.12 ± 0.06               | -15 ± 4             |
| NP-pD-Al | 185 ± 11         | 0.06 ± 0.02               | -6 ± 3              |

<sup>a</sup> PLGA NPs made of unlabeled PLGA.

n = 5 identically and independently prepared samples (mean ± standard deviation)

**Table S2.** Size of rhodamine-labeled NPs in 50% FBS

| NP type   | z-average (d.nm) | Polydispersity index (PI) |
|-----------|------------------|---------------------------|
| NP        | 105              | 0.54                      |
| NP-pD     | 116              | 0.42                      |
| NP/Al     | 113              | 0.47                      |
| NPxAl     | 100              | 0.32                      |
| NP-pD-Al  | 107              | 0.38                      |
| NP-pD-PEG | 111              | 0.54                      |

NPs were suspended in 50% FBS to 0.1 mg/mL. The size and PI the NPs were measured by a Malvern Zetasizer Nano ZS90.

**Table S3.** Size, zeta potential and loading efficiency of PTX loaded NPs<sup>a</sup>

| name         | z-average (d.nm) | Polydispersity index (PI) | Zeta potential (mV) | PTX loading efficiency (LE %) |
|--------------|------------------|---------------------------|---------------------|-------------------------------|
| PTX@NPxAl    | 169 ± 5          | 0.12 ± 0.02               | -13 ± 1             | 7.9 ± 1.1                     |
| PTX@NP-pD-Al | 183 ± 4          | 0.10 ± 0.02               | -3.6 ± 0.3          | 3.4 ± 0.3                     |

<sup>a</sup> PLGA NPs made of unlabeled PLGA.

n = 6 identically and independently prepared samples (mean ± s.d.)

**Table S4.** Serum chemistry of B16F10 tumor bearing mice at 24 h after the last treatment of PBS, PTX@NPxAl, or PTX@NP-pD-Al

| Groups       | Parameters (Ref. Range)  |                              |                         |                          |               |
|--------------|--------------------------|------------------------------|-------------------------|--------------------------|---------------|
|              | GLU<br>(90-192<br>mg/dL) | CREA<br>(0.20-0.80<br>mg/dL) | ALT<br>(28-132<br>IU/L) | ALKP<br>(62-209<br>IU/L) | GGT<br>(IU/L) |
| PBS          | 185                      | 0.2                          | 450                     | 69                       | 54            |
|              | 202                      | 0.1                          | 44                      | 113                      | 19            |
| PTX@NPxAl    | 255                      | 0.3                          | >2000                   | 68                       | 37            |
|              | 178                      | 0.2                          | 898                     | 76                       | 17            |
|              | 265                      | 0.3                          | 2923                    | 98                       | 37            |
|              | 211                      | 0.2                          | 781                     | 88                       | 16            |
|              | 166                      | 0.1                          | 1069                    | 107                      | 47            |
| PTX@NP-pD-Al | 224                      | 0.2                          | 1147                    | 84                       | 29            |
|              | 181                      | 0.1                          | 62                      | 72                       | 16            |
|              | 158                      | 0.1                          | 88                      | 85                       | 73            |
|              | 170                      | 0.2                          | 70                      | 86                       | 28            |

Mice were treated with PBS (n = 2), PTX@NPxAl (n = 5), or PTX@NP-pD-Al (n = 4) at 15 mg/kg q3d × 2. One day after the second dose, mice were sacrificed for the analysis of serum chemistry. GLU, glucose; CREA, creatinine; ALT, alanine aminotransferase; ALKP, alkaline phosphatase; GGT, gamma glutamyl transferase.

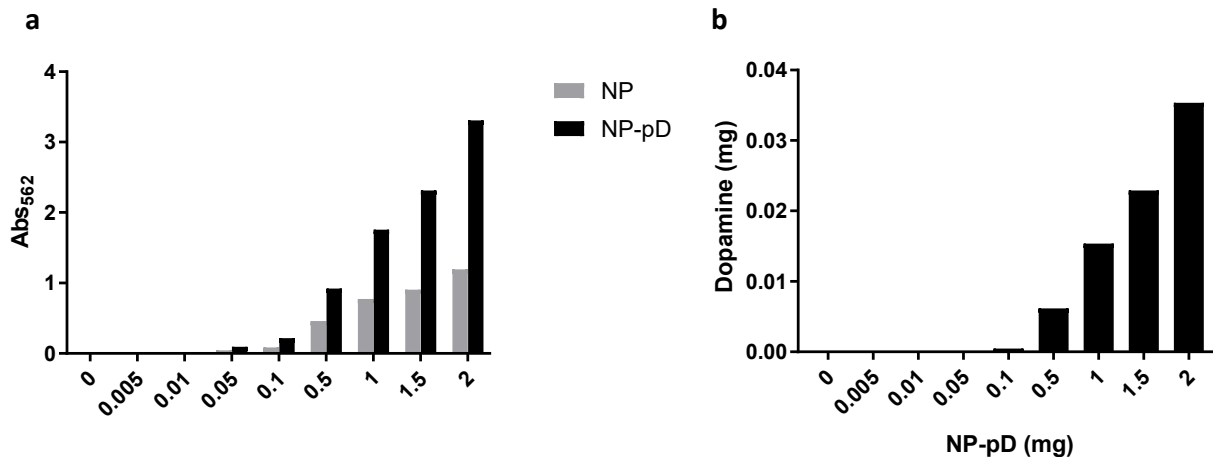

**Fig. S1.** Micro BCA assay of NP and NP-pD. (a) Absorbance (562 nm) difference between NP and NP-pD at different concentrations indicating the presence of pD. (b) The pD content in the NP-pD, estimated based on the absorbance difference between NP-pD and bare NP. Dopamine, NP, or NP-pD at different concentrations was incubated in the BCA working reagent for 2 h at 37 °C. A supernatant was separated from the NP suspension by centrifugation, and its absorbance was read at 562 nm. The pD content in NP-pD was estimated based on the absorbance difference between NP-pD and bare NP and a calibration curve drawn with dopamine solutions of known concentrations.

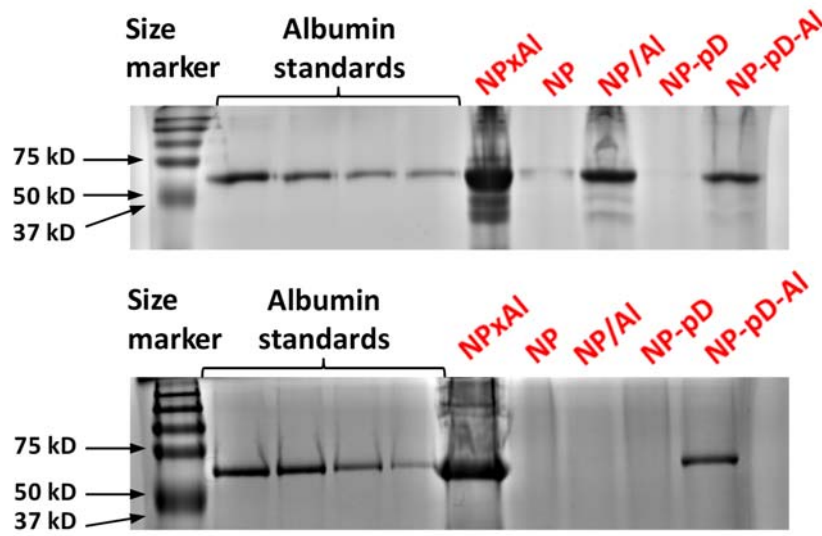

**Fig. S2.** Two representative SDS-PAGE gels for determination of albumin contents in NPs. Albumin standards were prepared as (Top) 0.0625, 0.03125, 0.015625 and 0.0125 mg/mL and (Bottom) 0.1, 0.08, 0.04 and 0.02 mg/mL.

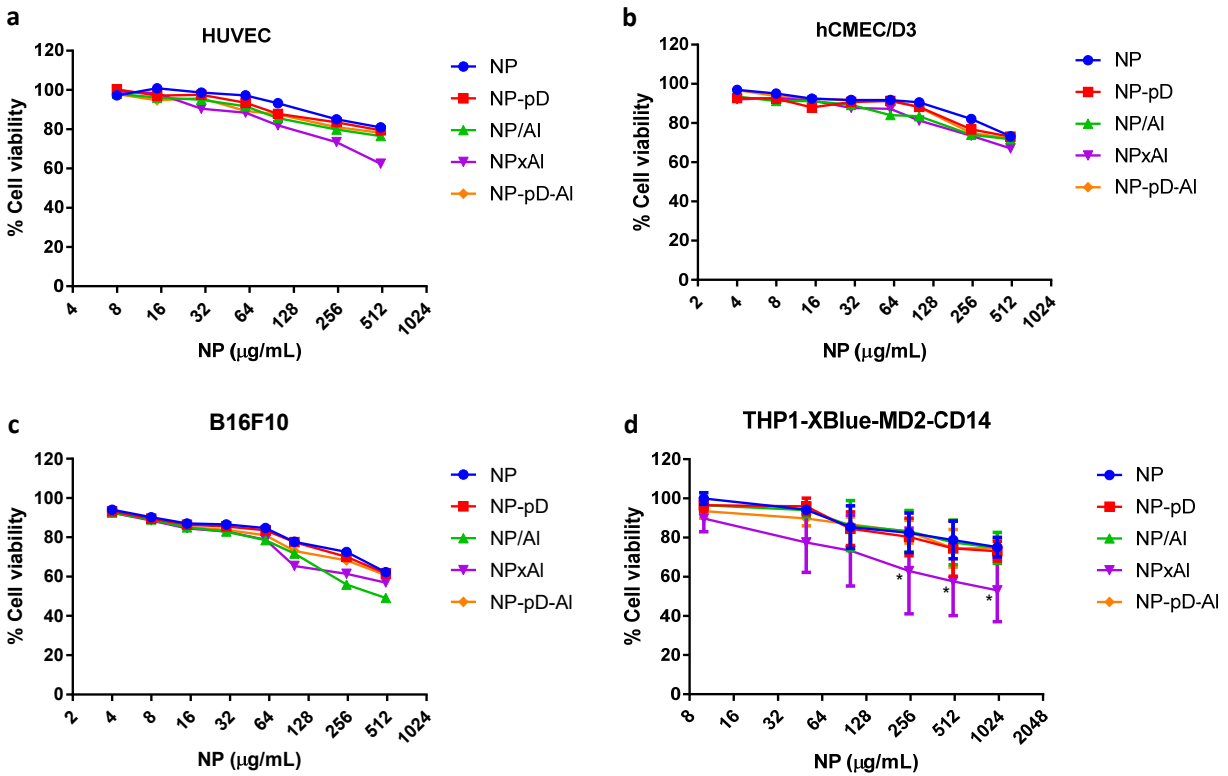

**Fig. S3.** Cell viability of (a) HUVEC and (b) hCMEC/D3 cells incubated with NPs (0-0.5 mg/mL) for 6 h; (c) B16F10 melanoma cells incubated with NPs (0-0.5 mg/mL) for 24 h; and (d) THP1-XBlue-MD2-CD14 cells incubated with NPs (0-1 mg/mL) for 24 h, in media supplemented with 2% (HUVEC and hCMEC/D3 cells) or 10% (B16F10 and THP1-XBlue-MD2-CD14 cells) FBS, determined by MTT assay ( $n = 3-4$  identically and independently prepared samples, mean  $\pm$  s.d.). \*:  $p < 0.05$  vs. NP by Dunnett's multiple comparisons test following two-way ANOVA.



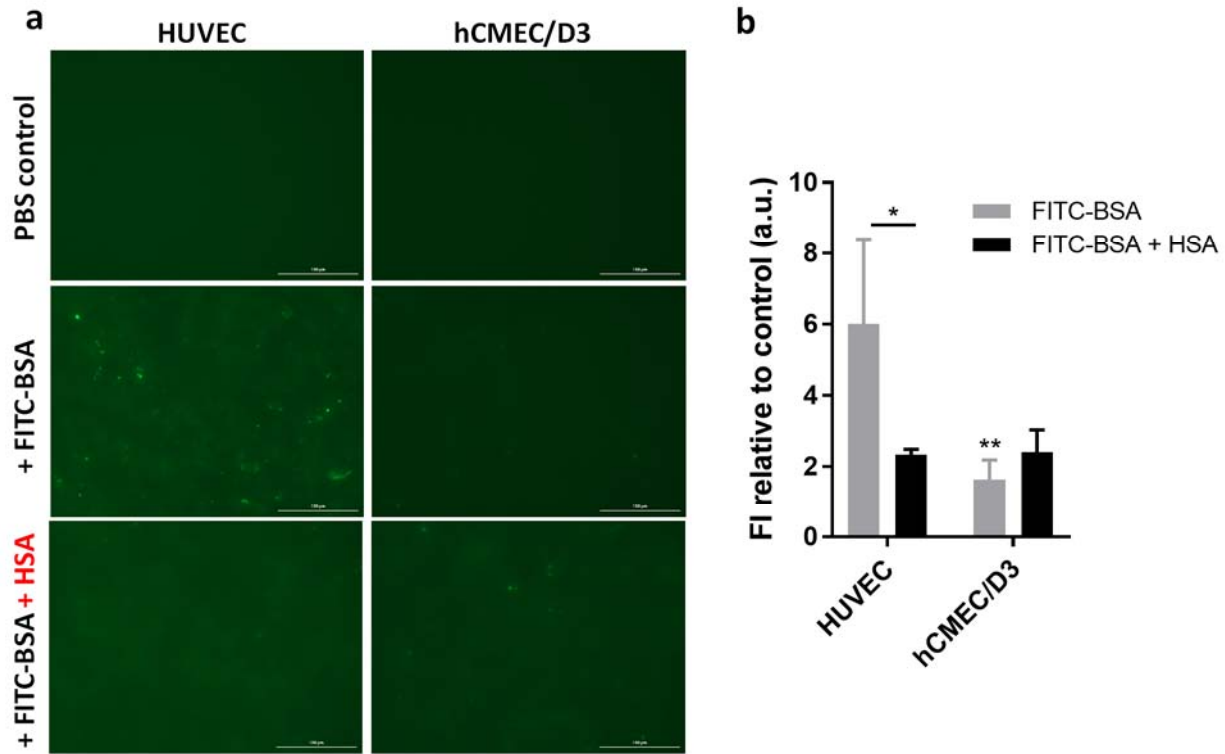

**Fig. S4.** Cells were incubated with PBS (control), FITC-BSA (0.8 mg/mL) alone or co-incubated with FITC-BSA and HSA (1.6 mg/mL) in the 10% serum-supplemented medium for 30 min. (a) Cells were imaged without fixation by a Biotek Cytation 3 cell imaging multimode reader. Scale bars = 100  $\mu$ m. (b) FITC-BSA interactions with HUVEC or hCMEC/D3 were determined by flow cytometry.  $n = 3$  identically and independently prepared samples (mean  $\pm$  s.d.) \*:  $p < 0.05$ ; \*\*:  $p < 0.01$  vs. HUVEC with a corresponding treatment, by Sidak's multiple comparisons test following two-way ANOVA.

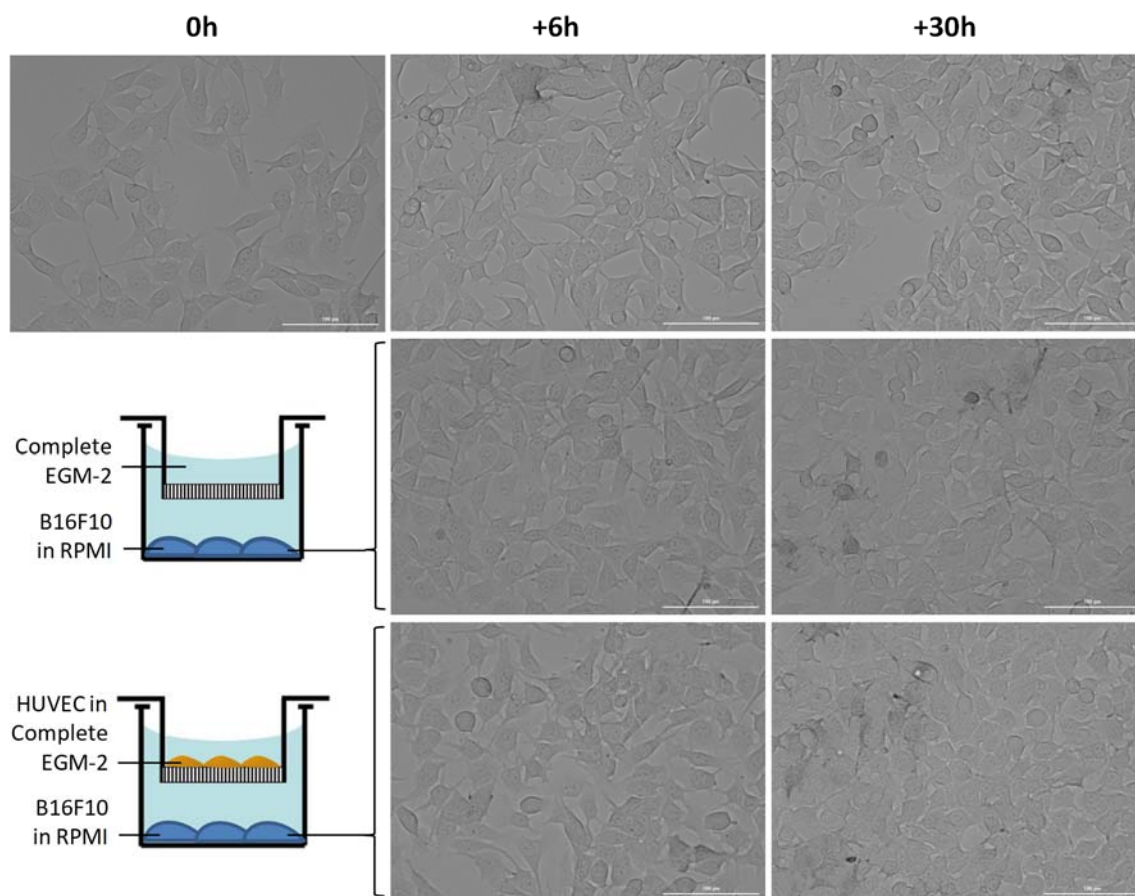

**Fig. S5.** Images of B16F10 cells after 6 and 30 h (6+24 h) incubation with complete EGM-2 media  $\pm$  HUVEC seeded on the Transwell insert. Scale bar: 100  $\mu$ m.

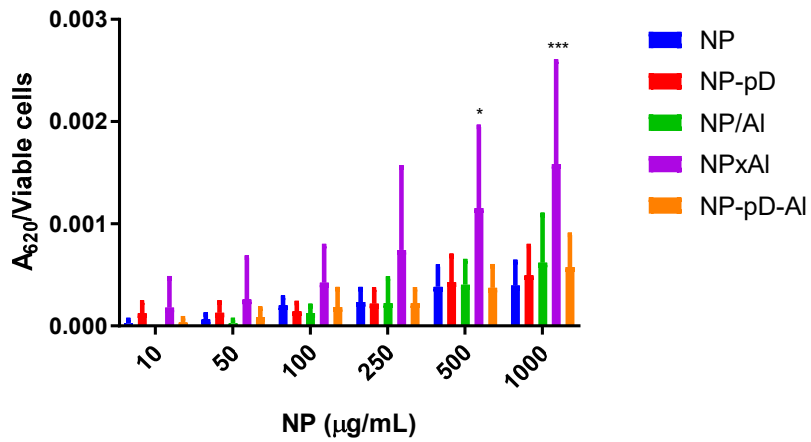

**Fig. S6.** SEAP levels normalized to cell viability. THP1-XBlue-MD2-CD14 cells incubated with NPs (0.1 mg/mL) for 24 h, and the supernatants were analyzed for the production of SEAP.  $n = 3$  identically and independently prepared samples (mean  $\pm$  s.d.). \*:  $p < 0.05$ ; \*\*\*:  $p < 0.001$  vs. NP by Dunnett's multiple comparisons test following two-way ANOVA.

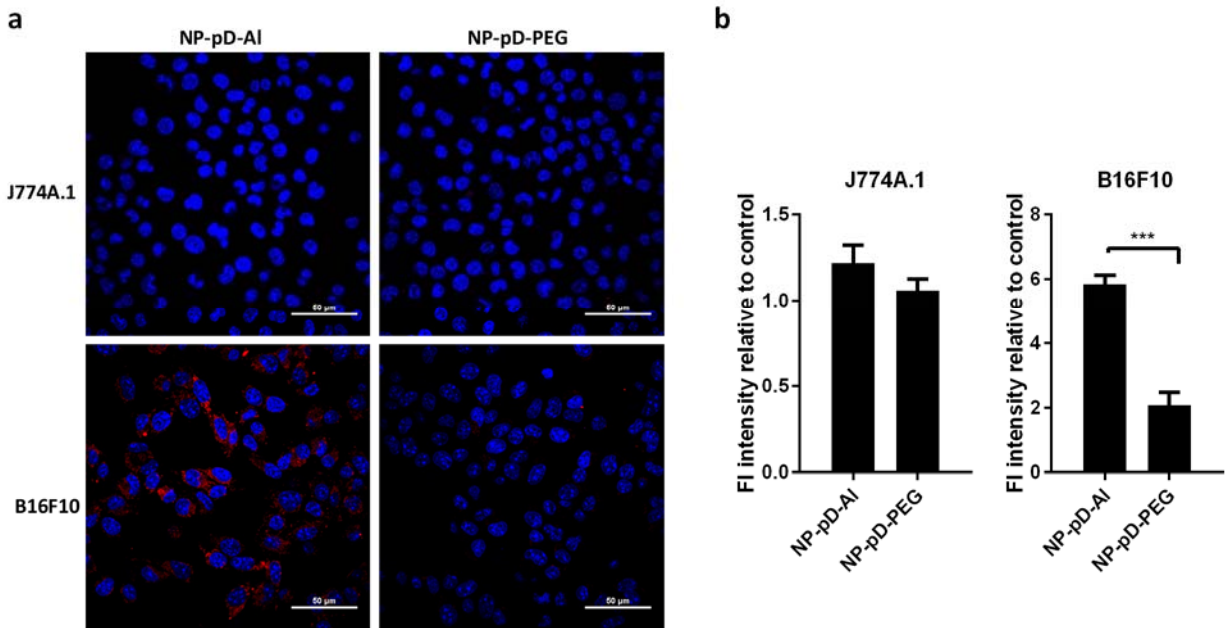

**Fig. S7.** Cellular uptake of NP-pD-Al and NP-pD-PEG (0.1 mg/mL) by J774A.1 macrophages after 30 min incubation and B16F10 cells after 1 h incubation in media supplemented with 10% serum. (a) Imaged by confocal microscopy (Red: rhodamine-labeled NPs; Blue: nuclei stained with Hoechst 33342). Scale bar: 50 μm. (b) Quantified by flow cytometry. n = 3 repeated tests of the same batch NPs. NP-pD-PEG was produced by incubating NP-pD with methoxyl polyethylene glycol 2000 Da (mPEG; Nanocs, New York, NY) at an mPEG-to-NP weight ratio of 2/1 for 30 min in Tris buffer (10 mM, pH 8.5). The NP-pD-PEG was collected by centrifugation at 13,600 rcf for 20 min at 4 °C and washed twice with DI water.

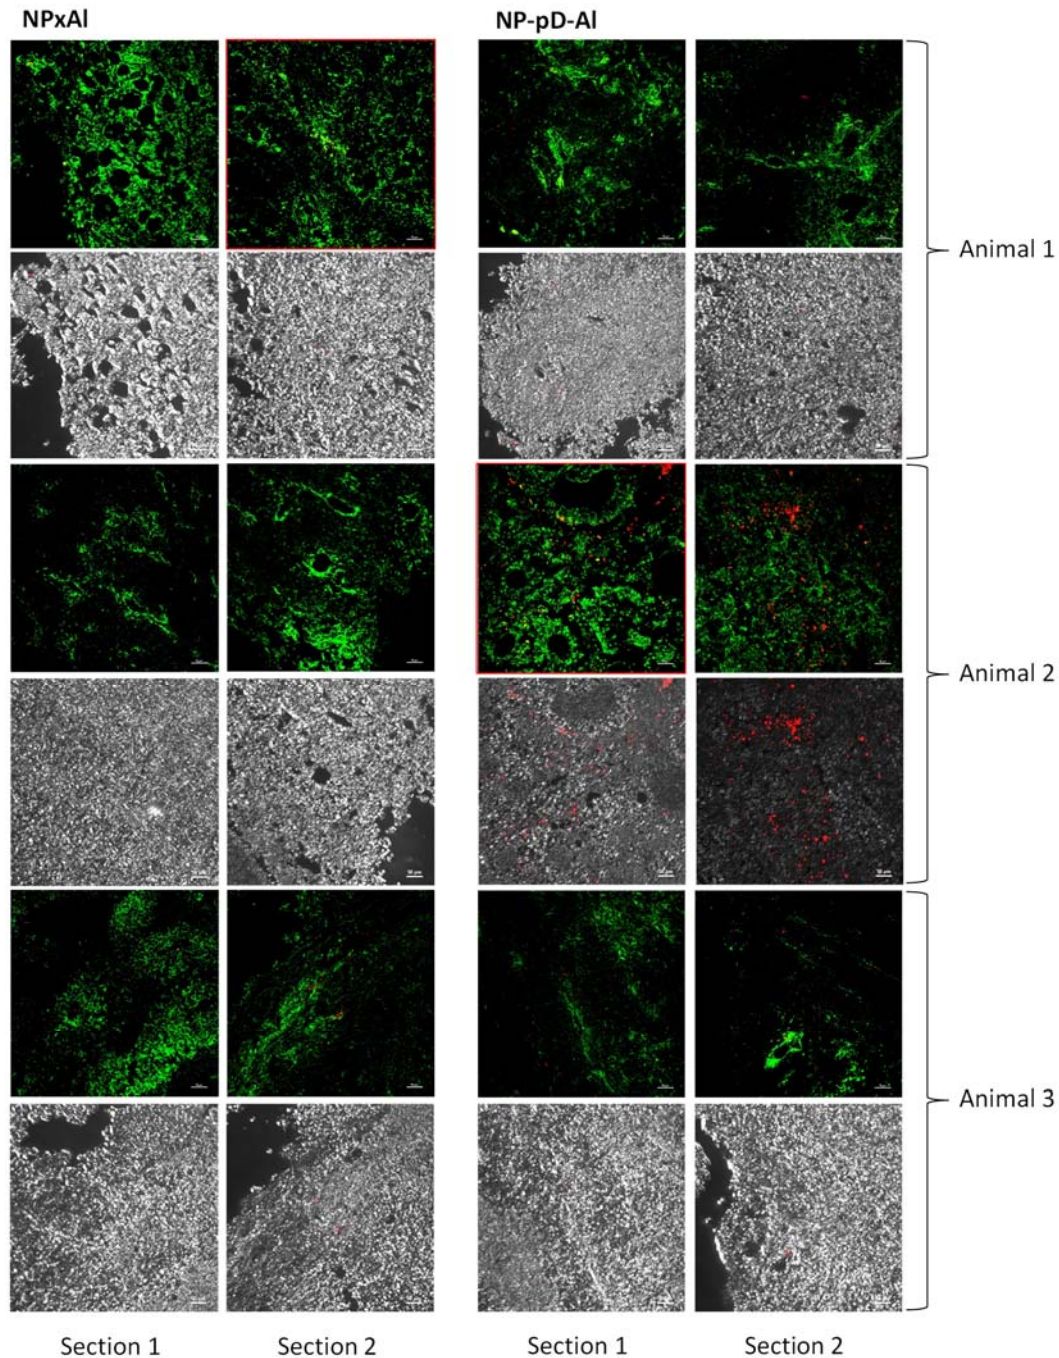

**Fig. S8.** All images of fluorescently labeled NPs (red) in FITC-lectin stained **tumor** blood vessels (green). A series of z-stack images were collected from two randomly selected fields per slide (16- $\mu$ m cryostat section) at 0.5  $\mu$ m intervals and presented as projection images. Mice (n=3 per group) were given a single IV injection of fluorescently labeled NPxAl or NP-pD-Al at 300 mg NP/kg. After 24 h, mice were injected IV with lectin-FITC (100  $\mu$ L, 1 mg/mL in saline), perfused with saline 5 min later and sacrificed. Scale bars = 50  $\mu$ m. Images used in the main text are highlighted with red outline.

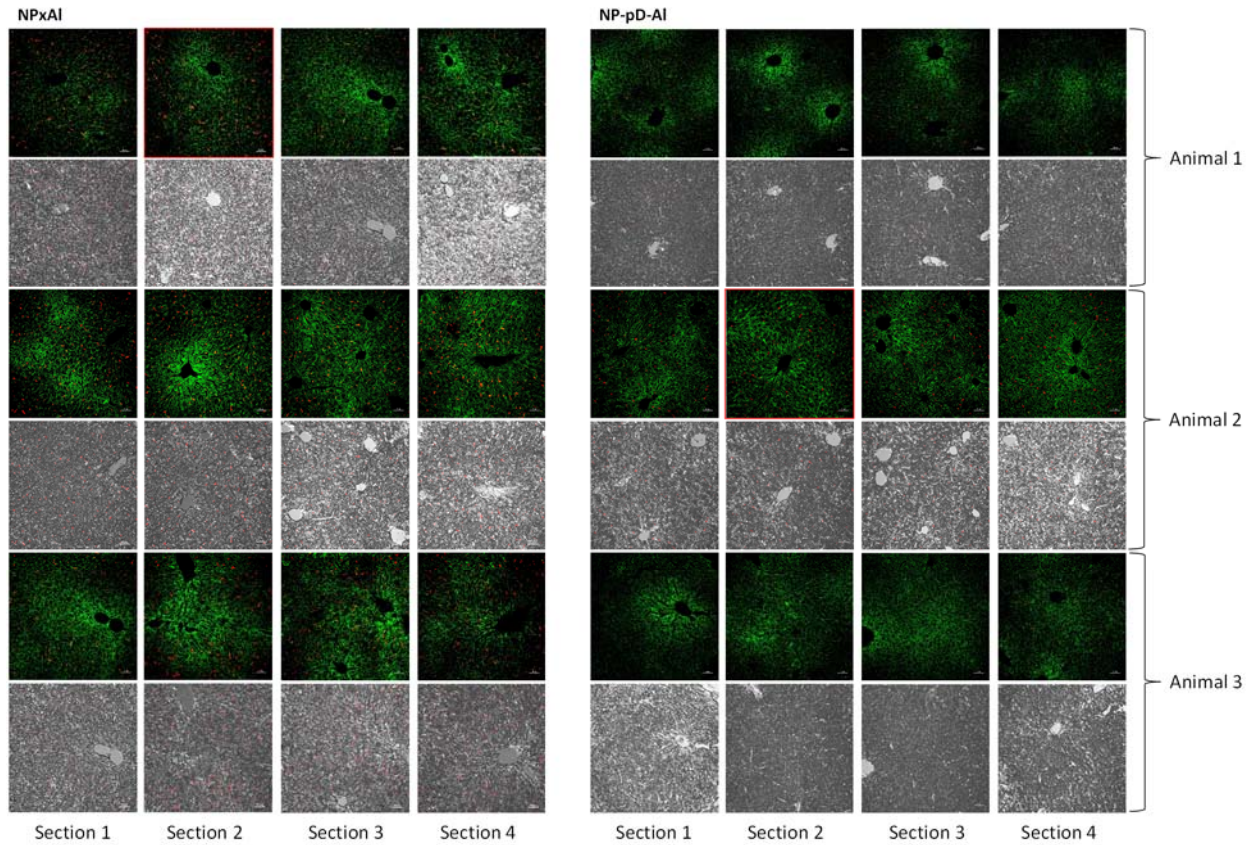

**Fig. S9.** All images of fluorescently labeled NPs (red) in FITC-lectin stained **liver** blood vessels (green). A series of z-stack images were collected from four randomly selected fields per slide (16- $\mu\text{m}$  cryostat section) at 0.5  $\mu\text{m}$  intervals and presented as projection images. Mice (n=3 per group) were given a single IV injection of fluorescently labeled NPxAl or NP-pD-Al at 300 mg NP/kg. After 24 h, mice were injected IV with lectin-FITC (100  $\mu\text{l}$ , 1 mg/mL in saline), perfused with saline 5 min later and sacrificed. Scale bars = 50  $\mu\text{m}$ . Images used in the main text are highlighted with red outline.

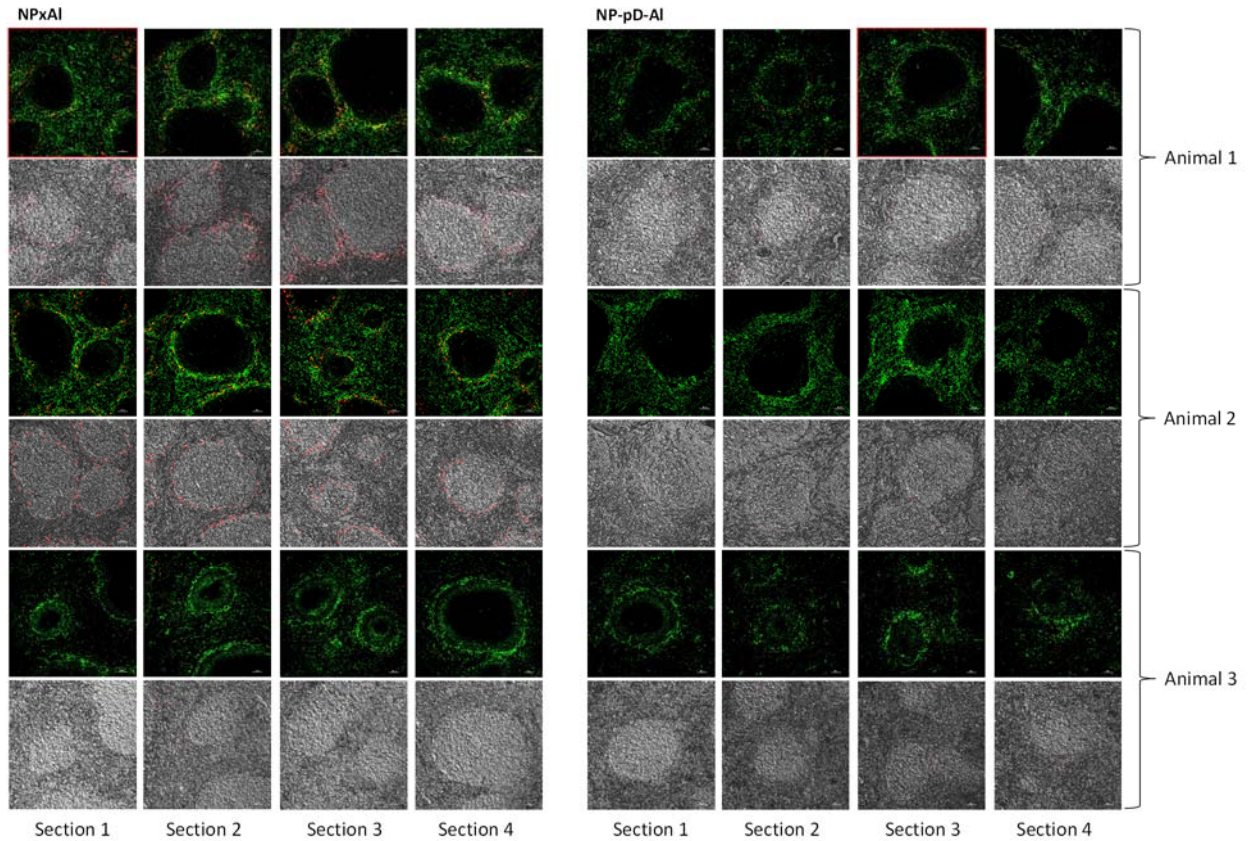

**Fig. S10.** All images of fluorescently labeled NPs (red) in FITC-lectin stained **spleen** blood vessels (green). A series of z-stack images were collected from four randomly selected fields per slide (16- $\mu$ m cryostat section) at 0.5  $\mu$ m intervals and presented as projection images. Mice ( $n=3$  per group) were given a single IV injection of fluorescently labeled NPxAl or NP-pD-Al at 300 mg NP/kg. After 24 h, mice were injected IV with lectin-FITC (100  $\mu$ l, 1 mg/mL in saline), perfused with saline 5 min later and sacrificed. Scale bars = 50  $\mu$ m. Images used in the main text are highlighted with red outline.

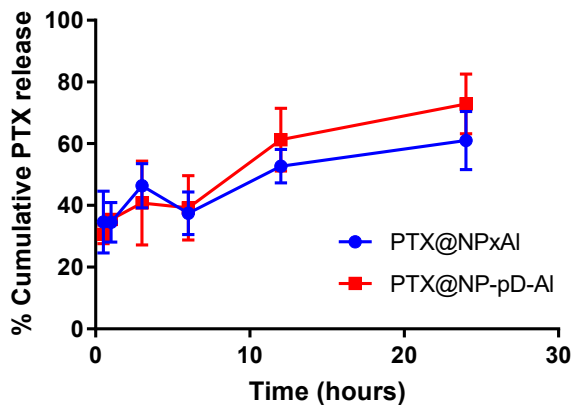

**Fig. S11.** Release kinetics of PTX/NPs in PBST (PBS containing 0.2% Tween 80). PTX@NPxAl or PTX@NP-pD-Al were suspended in PBS containing 0.2% Tween 80 (PBST) to a concentration equivalent to PTX 4  $\mu\text{g}/\text{mL}$ . The NP suspensions were divided into multiple 1 mL aliquots and incubated at 37  $^{\circ}\text{C}$  with constant agitation. At each time point, the aliquots were centrifuged to separate NP pellets and supernatants. The supernatant was analyzed using HPLC. n=3 tests with representative batches (mean  $\pm$  s.d.).



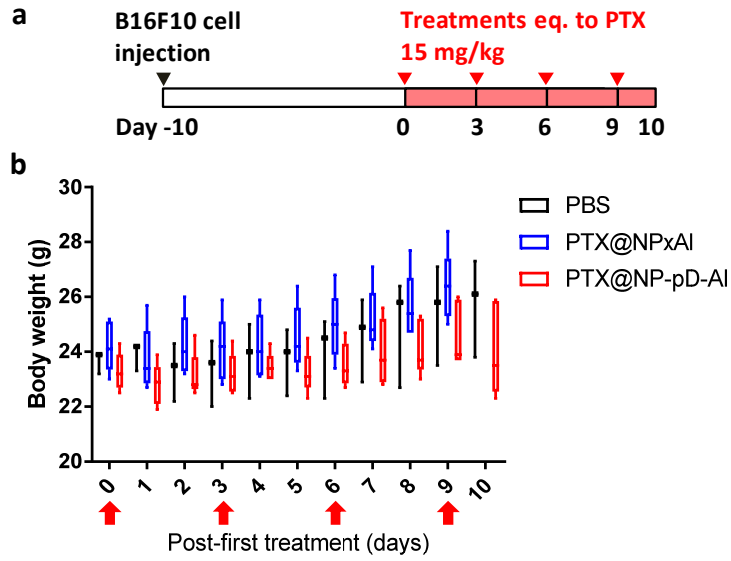

**Fig. S12.** (a) Dosing schedule of PTX-loaded NPs and (b) body weight change of animals. PBS (black; n = 3); PTX@NPxAl (blue; n = 5); PTX@NP-pD-Al (red; n = 5). Arrows indicate treatment times.

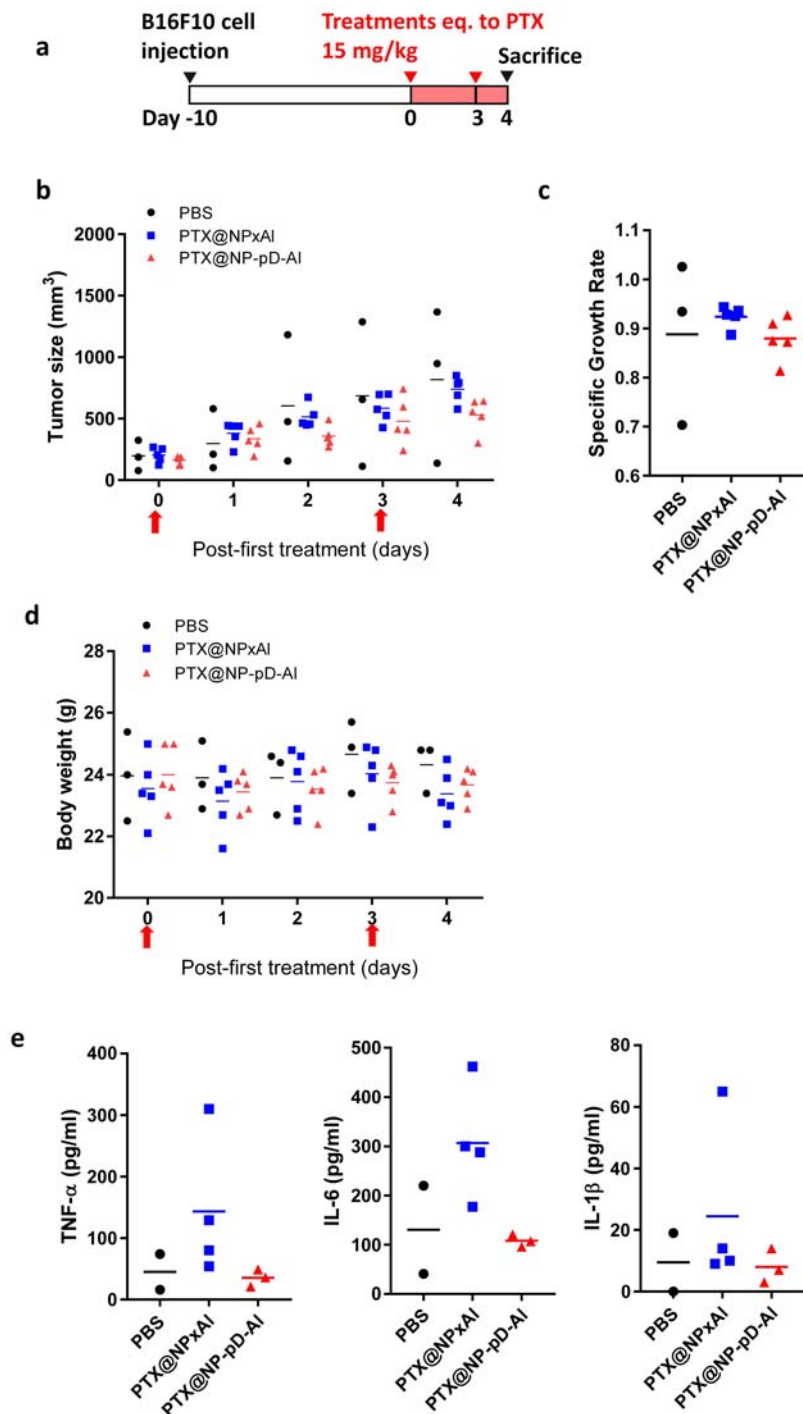

**Fig. S13.** In vivo activity of PTX@NPxAl and @NP-pD-Al in C57BL/6 mice. Mice were treated with PBS (n = 3), PTX@NPxAl (n = 5), or PTX@NP-pD-Al (n = 5) at 15 mg/kg q3d  $\times$  2. Arrows indicate treatment times. (a) Dosing schedule of PTX-loaded NPs, (b) tumor size (mm<sup>3</sup>), (c) specific growth rate of B16F10 tumor =  $\Delta\log V/\Delta t$  (V: tumor volumes; t: time in days), (d) body weight change of animals, and (e) serum levels of TNF- $\alpha$ , IL-6, and IL-1 $\beta$  in B16F10-tumor bearing mice treated with PBS (n = 2), PTX@NPxAl (n = 4) or PTX@NP-pD-Al (n = 3).

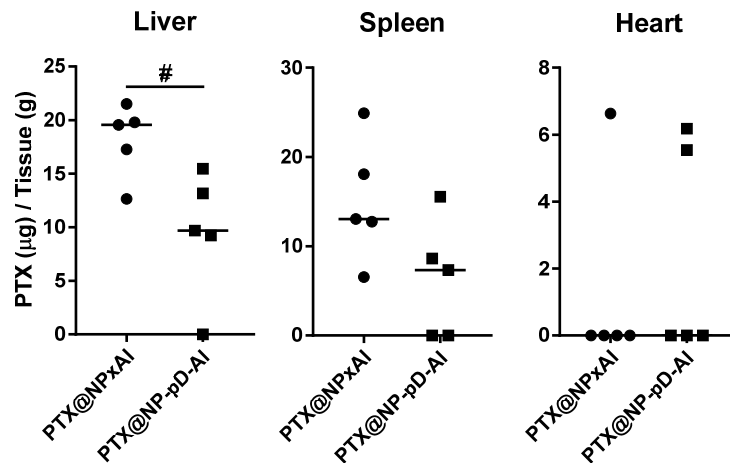

**Fig. S14.** PTX content in liver, spleen, and heart of B16F10 tumor-bearing mice. Mice were treated with PBS (n = 3), PTX@NPxAl (n = 5), or PTX@NP-pD-Al (n = 5) at a dose equivalent to PTX 15 mg/kg q3d × 2. One day after the second dose, mice were sacrificed for the analysis. #:  $p < 0.05$  by non-parametric Mann-Whitney test.

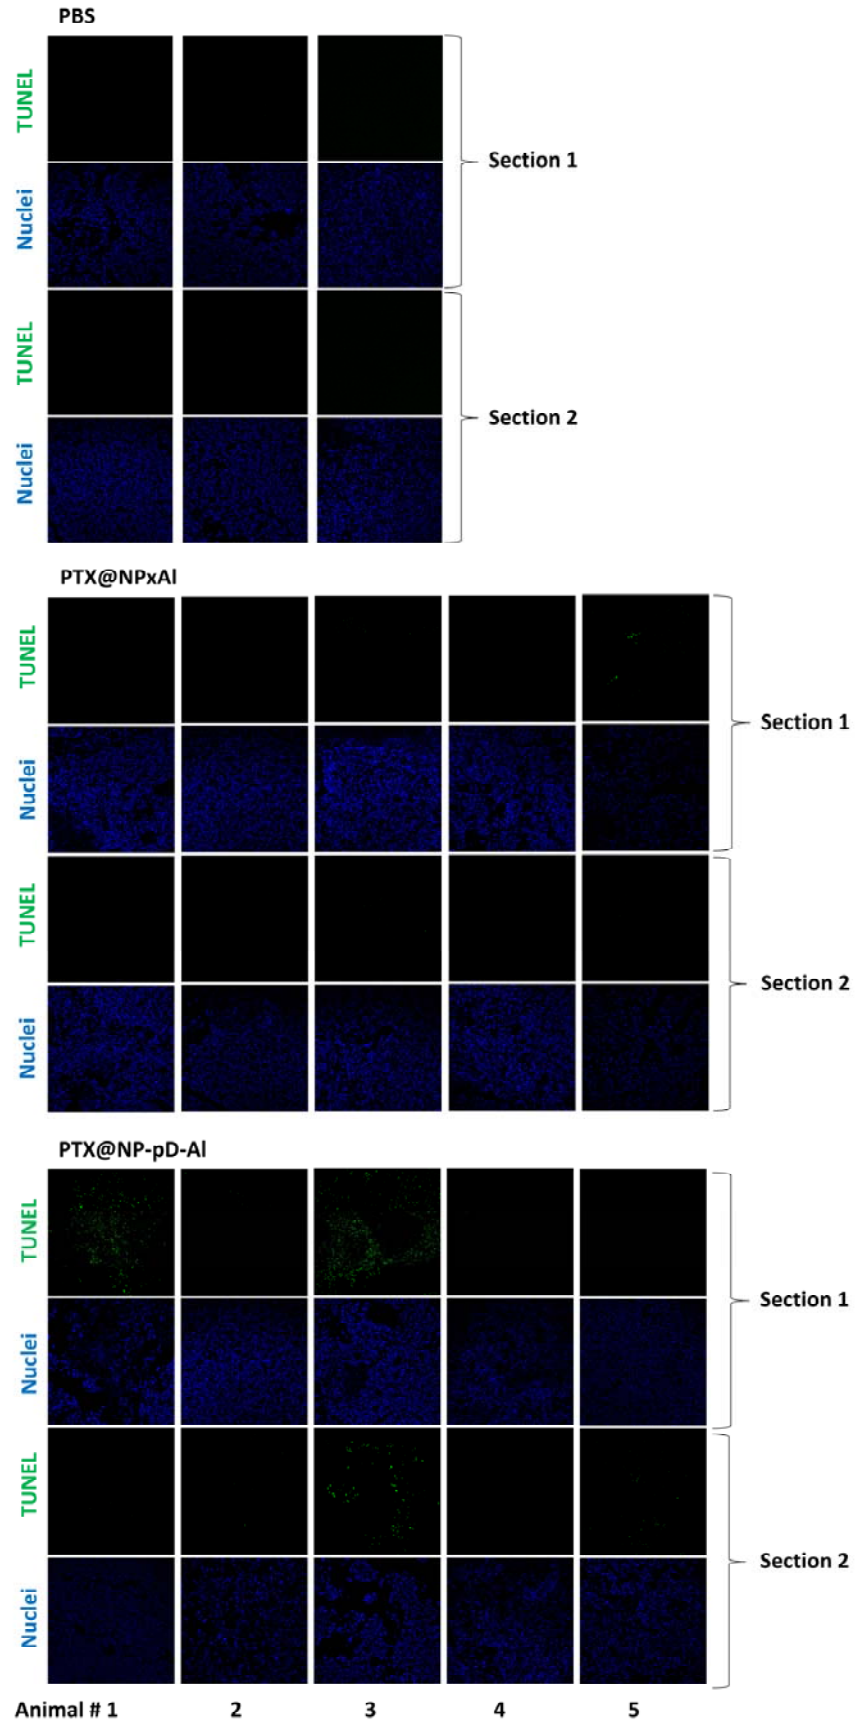

**Fig. S15.** All images of TUNEL-stained B16F10 tumor sections. Two randomly selected fields were imaged for each animal. Mice were treated with PBS (n = 3), PTX@NPxAl (n = 5), or PTX@NP-pD-Al (n = 5) at a dose equivalent to PTX 15 mg/kg q3d × 2. One day after the second dose, mice were sacrificed for the analysis. Scale bars = 50  $\mu$ m.

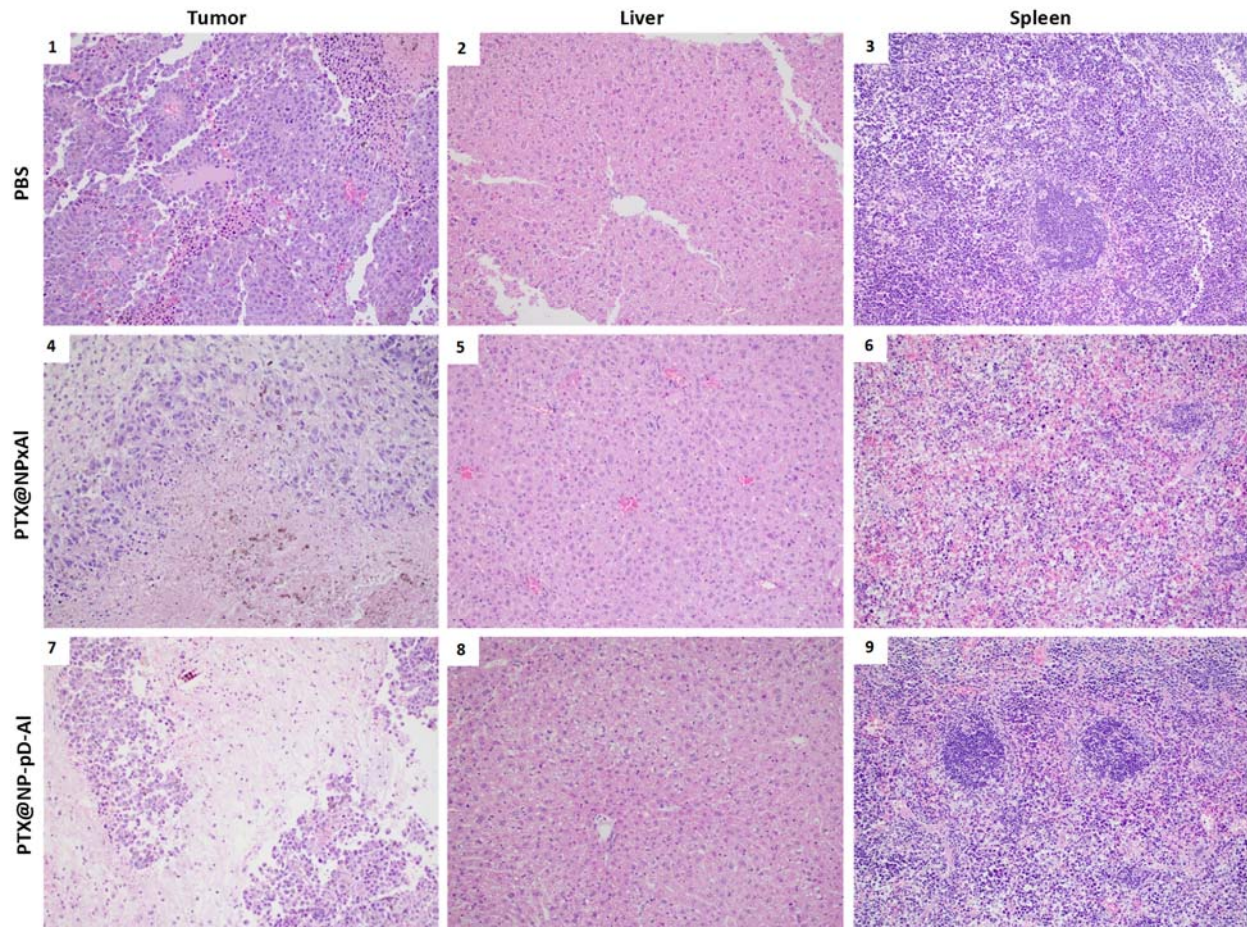

**Fig. S16.** Photomicrographs (20 $\times$  objective) of PBS treated (1-3) animals with rare tumor hemorrhage, rare vacuolar change within the liver, and normal spleen pathology. PTX@NPxAl treated animals (4-6) demonstrating multifocal tumor necrosis, multifocal vacuolar change within the liver, and lymphoid depletion within the spleen. PTX@NP-pD-Al treated animals (7-9) demonstrating marked tumor necrosis, multifocal vacuolar change within the liver, and lymphoid depletion within the spleen.
